# Supplementary material
Source: Springer Nature journal article supplement (https://www.springermedizin.de/resource/supplementary/12985_2009_783_MOESM1_ESM.pdf/9609188)
Supplement: MOESM1 [file 9609188]

### Swine influenza virus

### Human influenza virus

### Avian influenza virus

NE

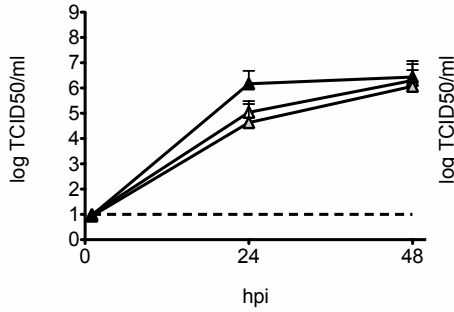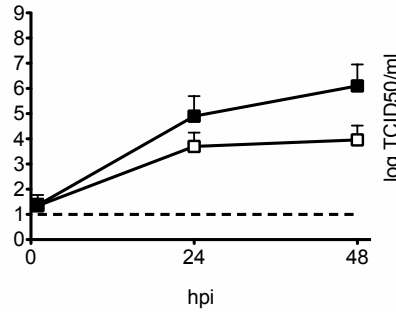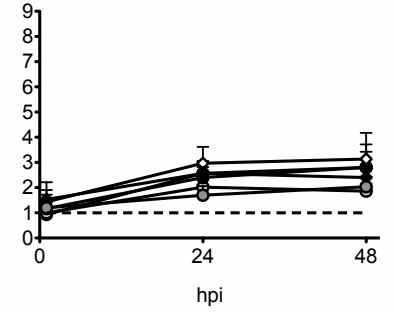

TE

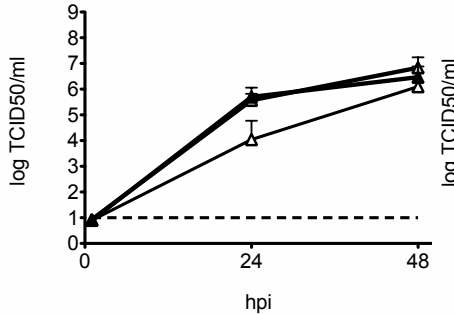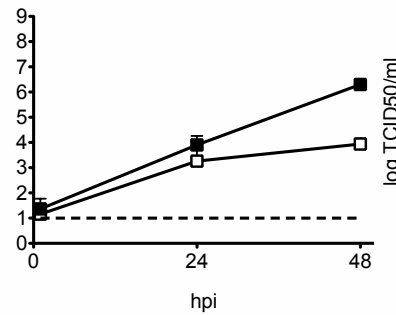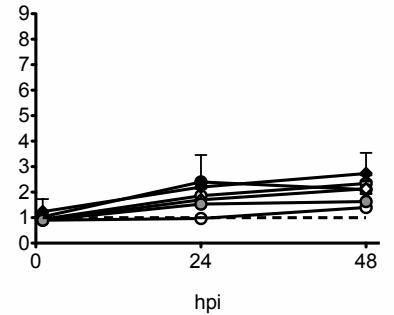

BE

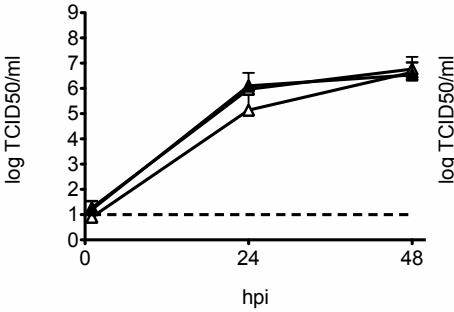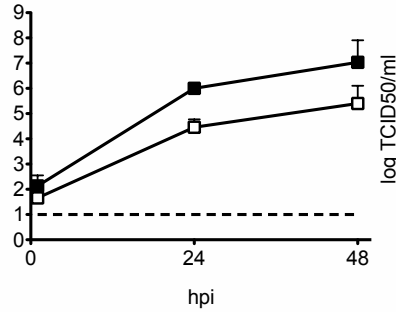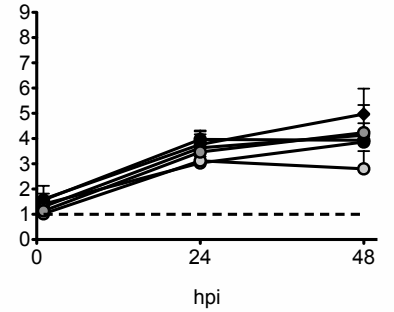

LE

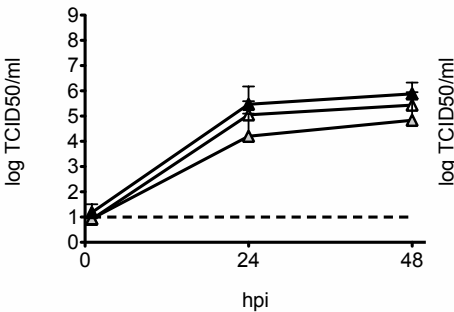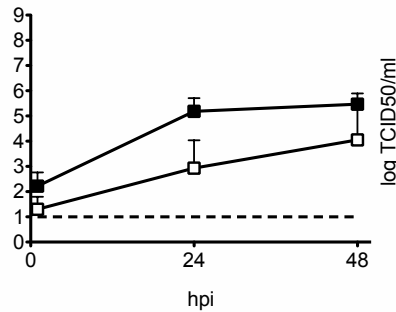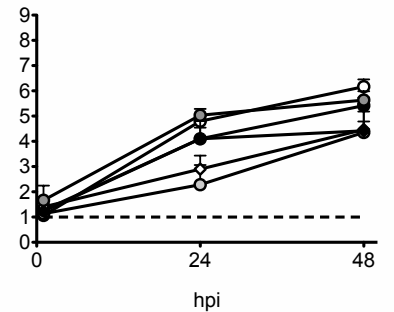

- △ Sw/Belgium/1/98 (H1N1)
- ▲ Sw/Flanders/1/98 (H3N2)
- Sw/Gent/7625/99 (H1N2)
- - - Detection limit

- A/New Caledonia/20/99 (H1N1)
- A/Panama/2007/99 (H3N2)
- - - Detection limit

- Duck/Italy/1447/05 (H1N1)
- Mallard/Alberta/279/98 (H3N8)
- Mallard/Italy/3401/2005 (H5N1)
- Duck/Belgium/06936/05 (H4N6)
- ◇ Chicken/Belgium/150/99 (H5N2)
- ◆ Chicken/Italy/1067/V99 (H7N1)
- - - Detection limit
